**Title: Morphofunctional deficits in the cerebral cortex of NeuroD2 mutant mice are associated with autism/schizophrenia-like behaviors**

Stéphane Bugeon <sup>1\*</sup>, Sahra Lafi <sup>1,2\*</sup>, Corinne Beurrier <sup>1&</sup>, Surajit Sahu <sup>2&</sup>, Karen Runge <sup>2</sup>, Fabienne Schaller <sup>2</sup>, Arthur Loubat <sup>2</sup>, Rémi Mathieu <sup>2</sup>, Leonard Herault <sup>3</sup>, Stéphane Gaillard <sup>4</sup>, Mélanie Cahuc <sup>2</sup>, Emilie Pallesi-Pocachard <sup>2</sup>, Aurélie Montheil <sup>2</sup>, Andreas Bosio <sup>5</sup>, Alfonso Represa <sup>2</sup>, Carlos Cardoso <sup>2</sup>, Harold Cremer <sup>1</sup> and Antoine de Chevigny <sup>1,2,6</sup>

<sup>1</sup> IBDM, Aix-Marseille University, CNRS, UMR 7288, Marseille, France

<sup>2</sup> INMED INSERM U901, Aix-Marseille University, Marseille, France

<sup>3</sup> TAGC INSERM U1090, Aix-Marseille University, Marseille, France

<sup>4</sup> Phenotype Expertise, 5 Boulevard du Maréchal Koenig, 13009 Marseille, France

<sup>5</sup> Miltenyi Biotec, Bergisch-Gladbach 51429, Germany.

<sup>6</sup> Author for correspondence:

**Antoine de Chevigny, PhD**

INMED INSERM U901

Campus de Luminy

13273 Marseille Cédex 09

[antoine.de-chevigny@inserm.fr](mailto:antoine.de-chevigny@inserm.fr)

+33 4 91 82 81 84

\*. & equal contribution

The authors have temporarily withdrawn their manuscript pending further experiments. The authors request that the manuscript is not cited. Please contact the corresponding author if you have any questions.
